# Supplementary material for: CSF1R blockade induces macrophage ablation and results in mouse choroidal vascular atrophy and RPE disorganization
Source: eLife journal article supplement (doi:10.7554/elife.55564), 2020-04-01
Supplement: supp [file elife-55564-supp-v1.zip]

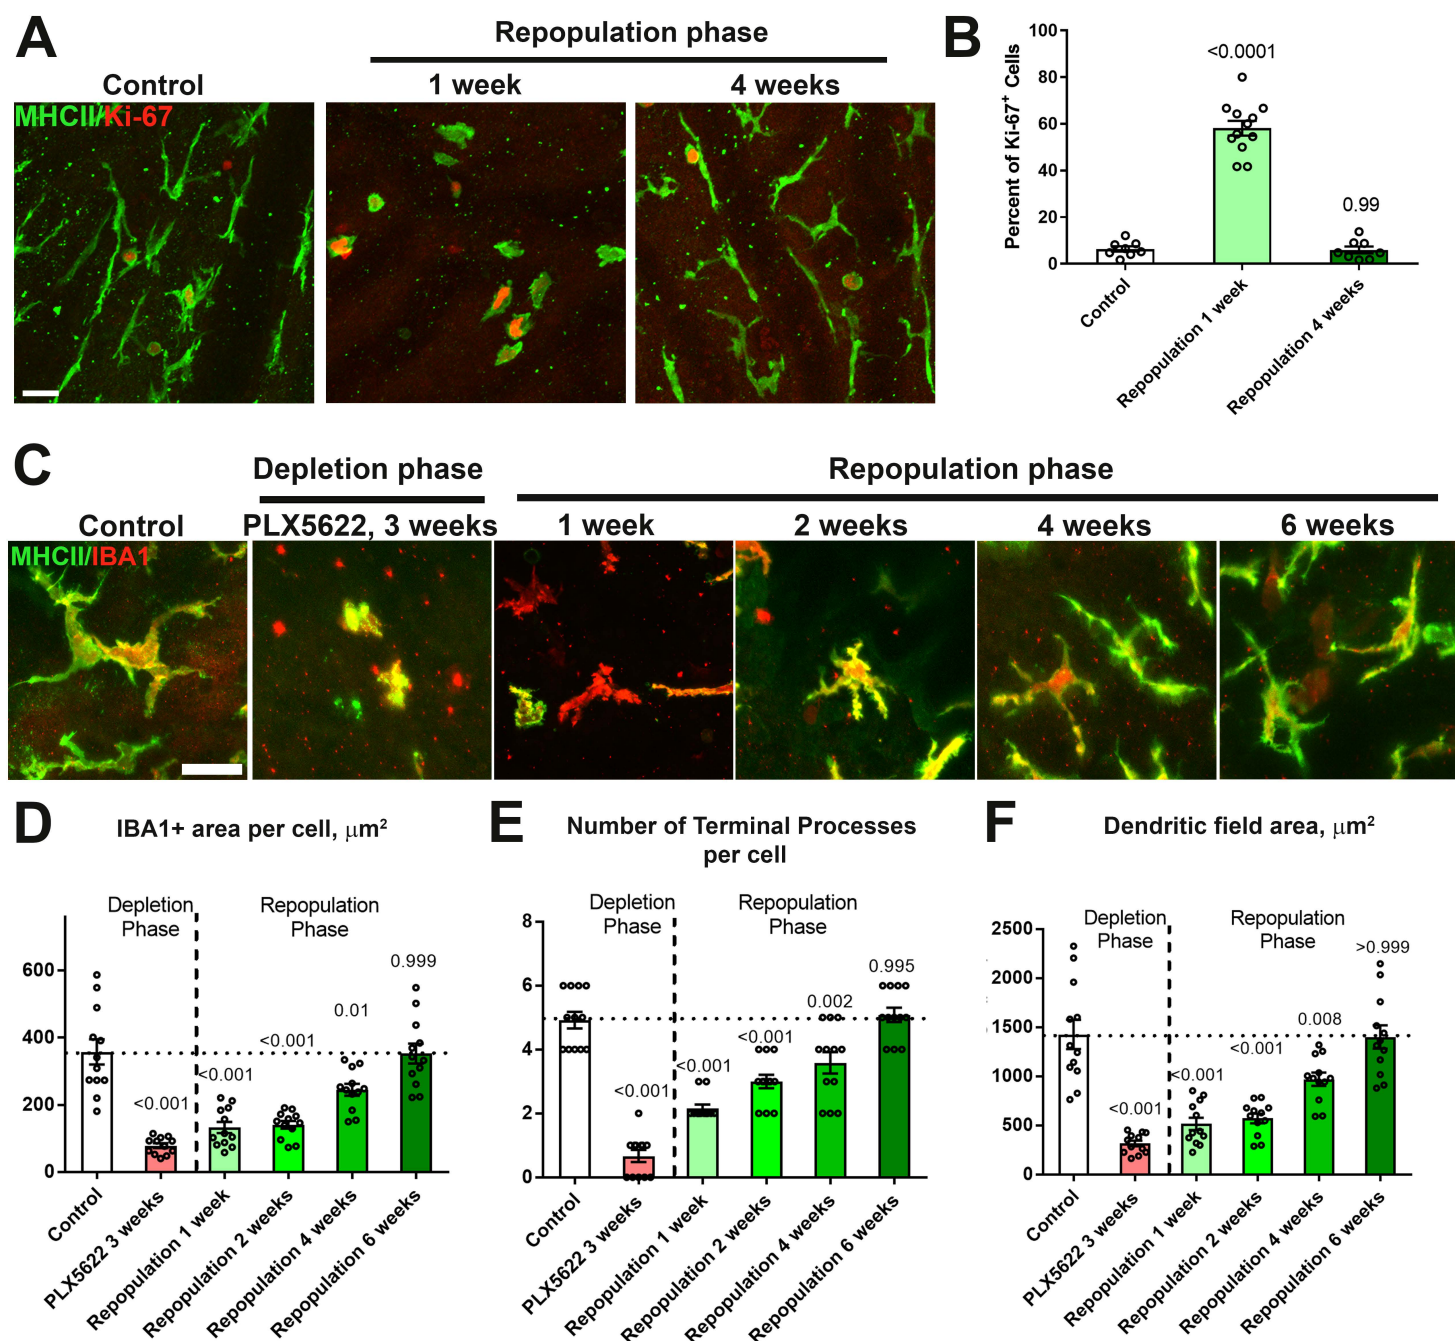

**Figure 6-figure supplement 1. Repopulating choroidal macrophages demonstrate proliferation in situ and progressive morphological maturation.** (A, B) Ki67 immunopositivity was absent in MHCII<sup>+</sup> repopulating macrophages in undepleted control animals but was prominent at 1 week of repopulation. The proportion of Ki67<sup>+</sup> in MHCII<sup>+</sup> cells declined to control levels by 4 weeks. Scale bar = 20 $\mu\text{m}$ . (C) High magnification images of choroidal macrophages showing deramified morphologies during depletion and a progressive recovery of ramified morphologies during macrophage repopulation. Scale bar = 20 $\mu\text{m}$ . Quantitative morphological analyses of repopulating macrophages showed progressive enlargement of cell size (defined as the area of IBA1-immunopositivity per cell) (D), increasing ramification (in terms of number of terminal processes per cell) (E), and increasing dendritic field size (defined as the area of the bounding polygon around each cell) (F). Full recapitulation of these morphological measures back to baseline levels was achieved at 6 weeks into the repopulation phase. P values represent comparisons to control levels, 1-way ANOVA with Tukey's correction for multiple comparisons. *n* = 4 animals each treatment group.
