# Supplementary material for: CSF1R blockade induces macrophage ablation and results in mouse choroidal vascular atrophy and RPE disorganization
Source: eLife journal article supplement (doi:10.7554/elife.55564), 2020-04-01
Supplement: supp [file elife-55564-supp-v1.zip]

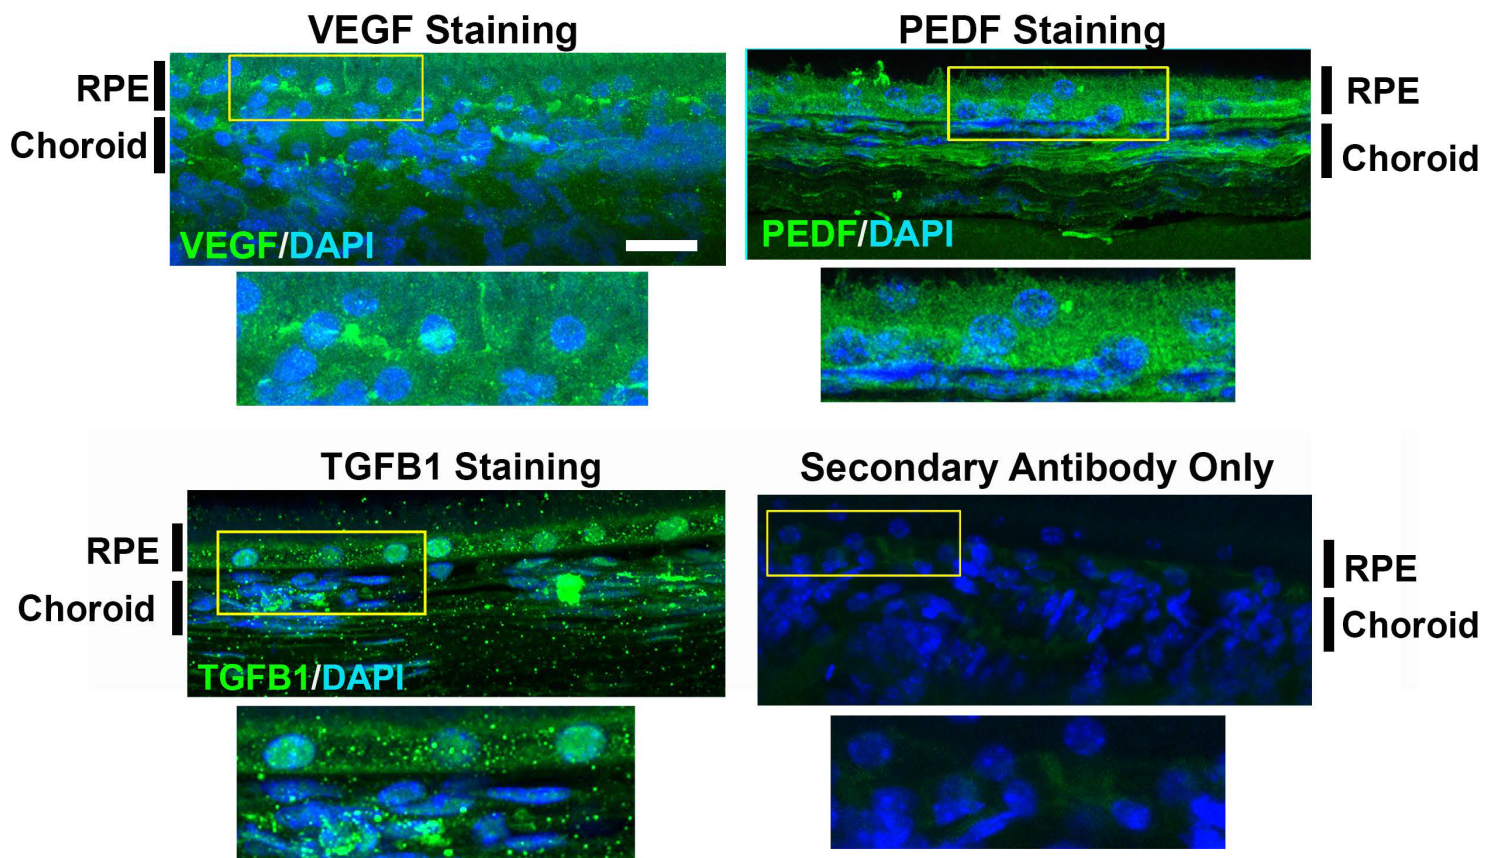

**Figure 5-figure supplement 2. Secondary antibody staining control.** Choroidal sections were labeled with primary antibodies to VEGF, PEDF, TGF $\beta$ 1. Negative controls constituted sections labeled with the secondary antibody only, in the absence of primary antibodies. n = 3 animals in each treatment group.
