# Supplementary material for: CSF1R blockade induces macrophage ablation and results in mouse choroidal vascular atrophy and RPE disorganization
Source: eLife journal article supplement (doi:10.7554/elife.55564), 2020-04-01
Supplement: supp [file elife-55564-supp-v1.zip]

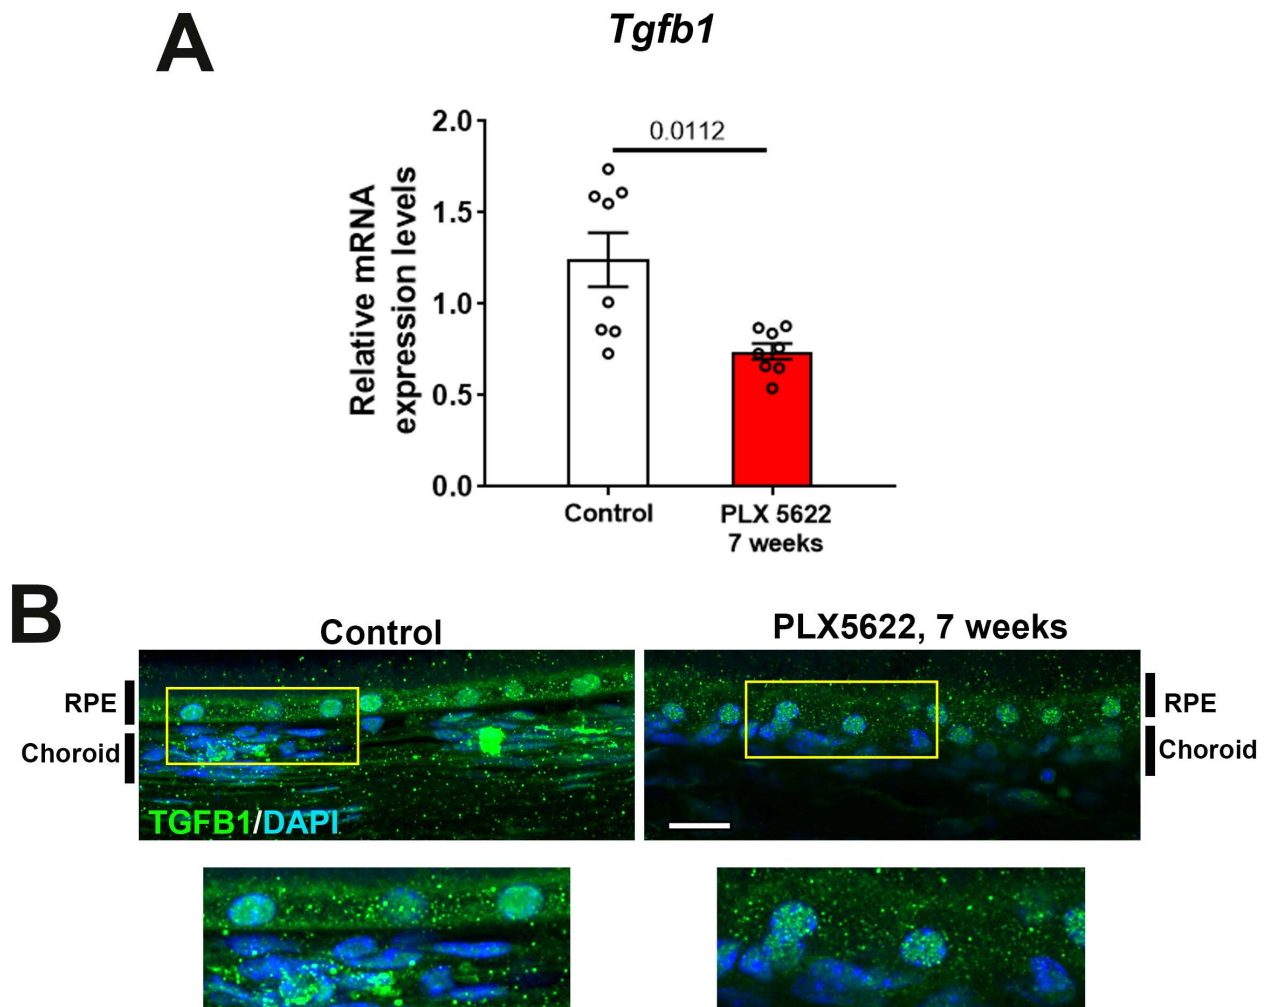

**Figure 5-figure supplement 1. mRNA expression levels of *Tgfb1* were altered following sustained depletion of choroidal macrophages.** Changes in mRNA expression of *Tgfb1* in sclerochoroidal tissue were evaluated with RT-PCR following 7 weeks of continuous PLX5622 administration. Age-matched untreated animals served as controls. mRNA level of *Tgfb1* (**A**) was significantly reduced following 7 weeks of macrophage depletion. Immunohistochemical localization demonstrated decreased TGF $\beta$ 1 immunopositivity in the RPE layer and choroid following macrophage depletion (**B**). P values represent comparison to control level using an unpaired t-test with Welch's correction. Scale bars = 20  $\mu$ m, **n = 4 to 8 animals per treatment group.**
