# Supplementary material for: CSF1R blockade induces macrophage ablation and results in mouse choroidal vascular atrophy and RPE disorganization
Source: eLife journal article supplement (doi:10.7554/elife.55564), 2020-04-01
Supplement: supp [file elife-55564-supp-v1.zip]

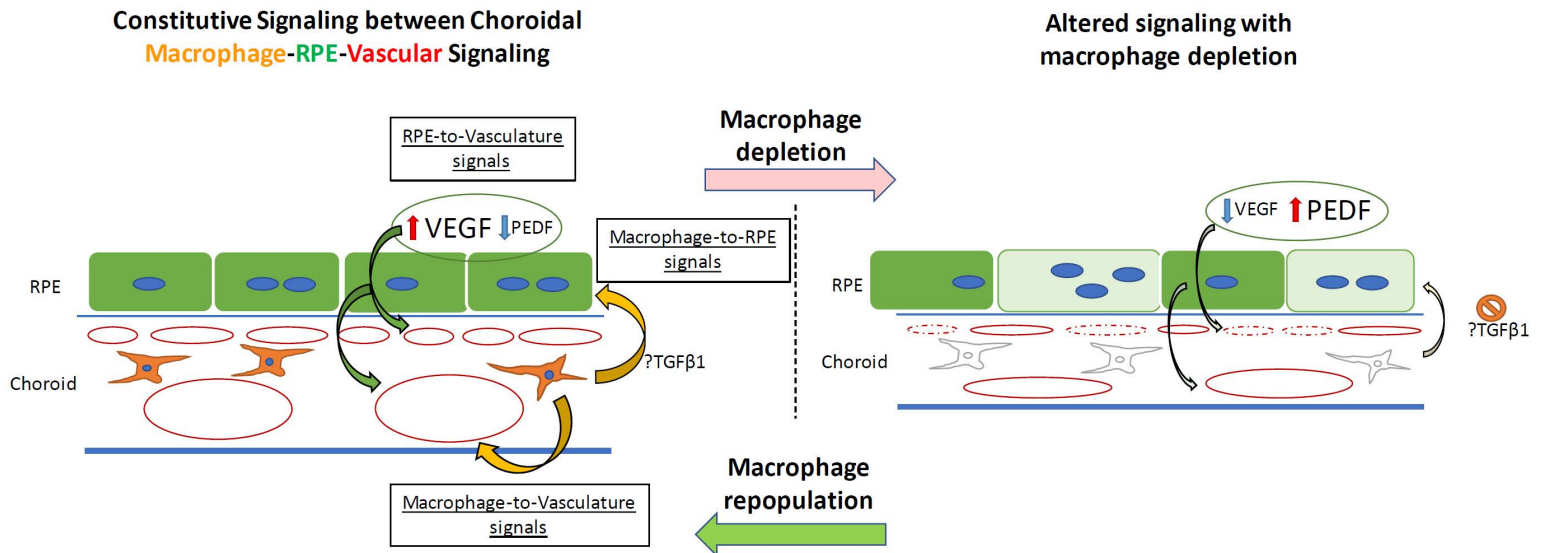

**Figure 9-figure supplement 1. Schematic showing putative signaling between choroidal macrophages, vasculature, and the RPE layer in the outer retina under normal conditions and with choroidal macrophage depletion. (Left)** In the normal adult choroid, angiogenic signals (VEGF, PEDF) secreted from the RPE cell layer regulate local choroidal vascular structure. Choroidal macrophages produce potential trophic signals that influence RPE structure and angiogenic secretion (e.g. TGFβ1), secondarily influencing vascular maintenance. Potential uncharacterized angiogenic signals may also originate from choroidal macrophages to impinge onto choroidal vasculature to maintain them. **(Right)** With the ablation of choroidal macrophages, macrophage trophic signals are diminished, leading to RPE cell structure changes and altered balanced of angiogenic factor production by RPE cells. These induce choroidal vascular atrophy, reducing choroidal thickness and decreasing choriocapillaris coverage.
