# Supplementary material for: CSF1R blockade induces macrophage ablation and results in mouse choroidal vascular atrophy and RPE disorganization
Source: eLife journal article supplement (doi:10.7554/elife.55564), 2020-04-01
Supplement: supp [file elife-55564-supp-v1.zip]

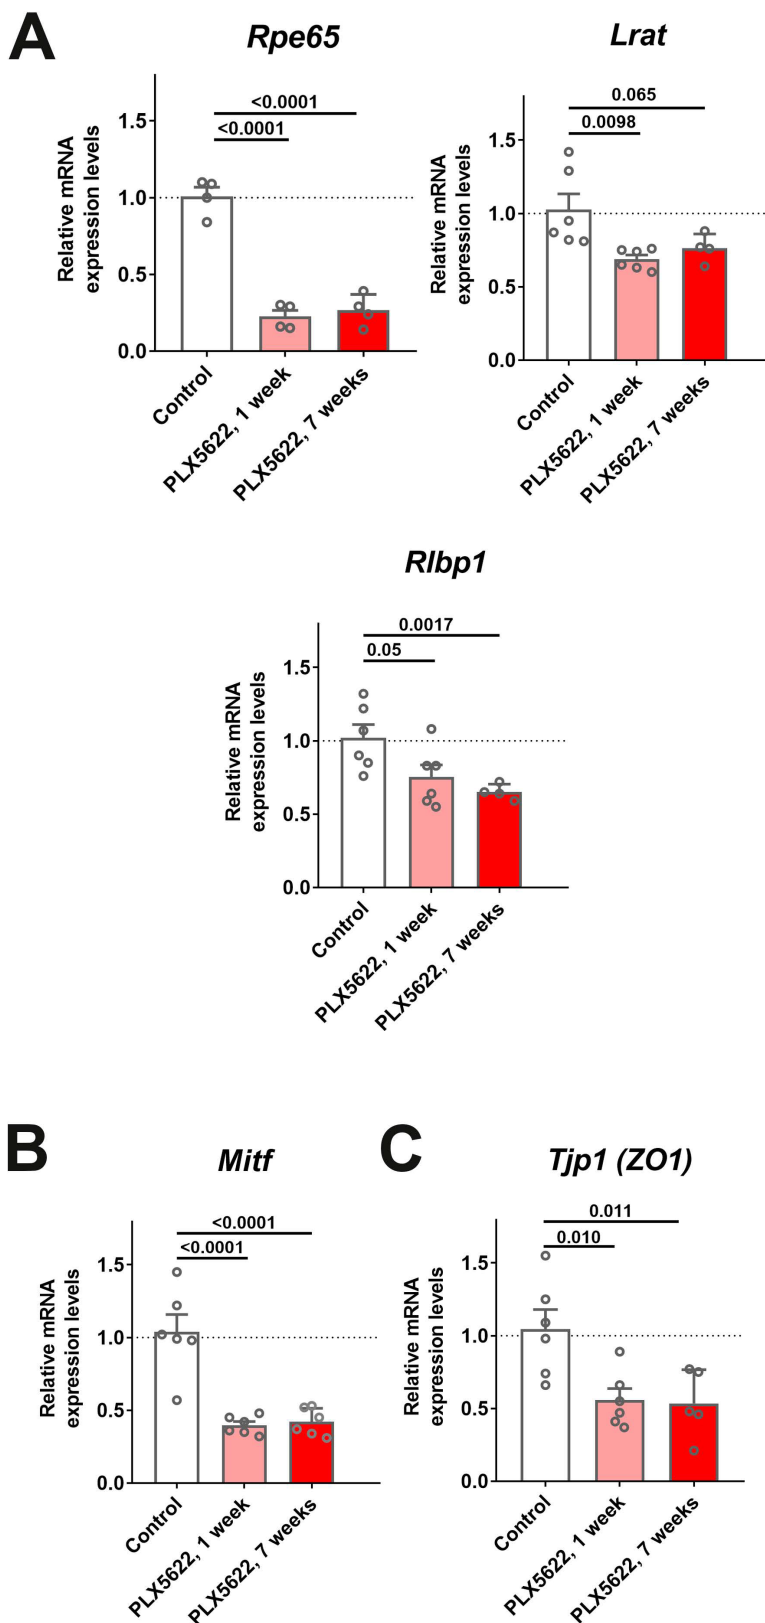

**Figure 4-figure supplement 1. mRNA expression levels of genes related to RPE function are altered following transient and sustained depletion of choroidal macrophages.** Changes in mRNA expression of RPE-specific genes in sclerochoroidal tissue following 1 and 7 weeks of continuous PLX5622 administration were evaluated with RT-PCR. Age-matched untreated animals served as controls. **(A)** RPE genes related to visual cycle function demonstrated general decreases; *Rpe65* expression was markedly decreased beginning at 1 week of treatment, with smaller relative changes were observed for *Lrat* and *Rlbp1*. *Mitf*, a transcriptional factor important for RPE differentiation **(B)**, and *Tjp1* (ZO1), a tight-junctional protein between RPE cells **(C)**, also showed significant decreases. P values correspond to comparisons relative to control made using a 1-way ANOVA test, n = 4-6 animals each treatment group.
