# Supplementary material for: CSF1R blockade induces macrophage ablation and results in mouse choroidal vascular atrophy and RPE disorganization
Source: eLife journal article supplement (doi:10.7554/elife.55564), 2020-04-01
Supplement: supp [file elife-55564-supp-v1.zip]

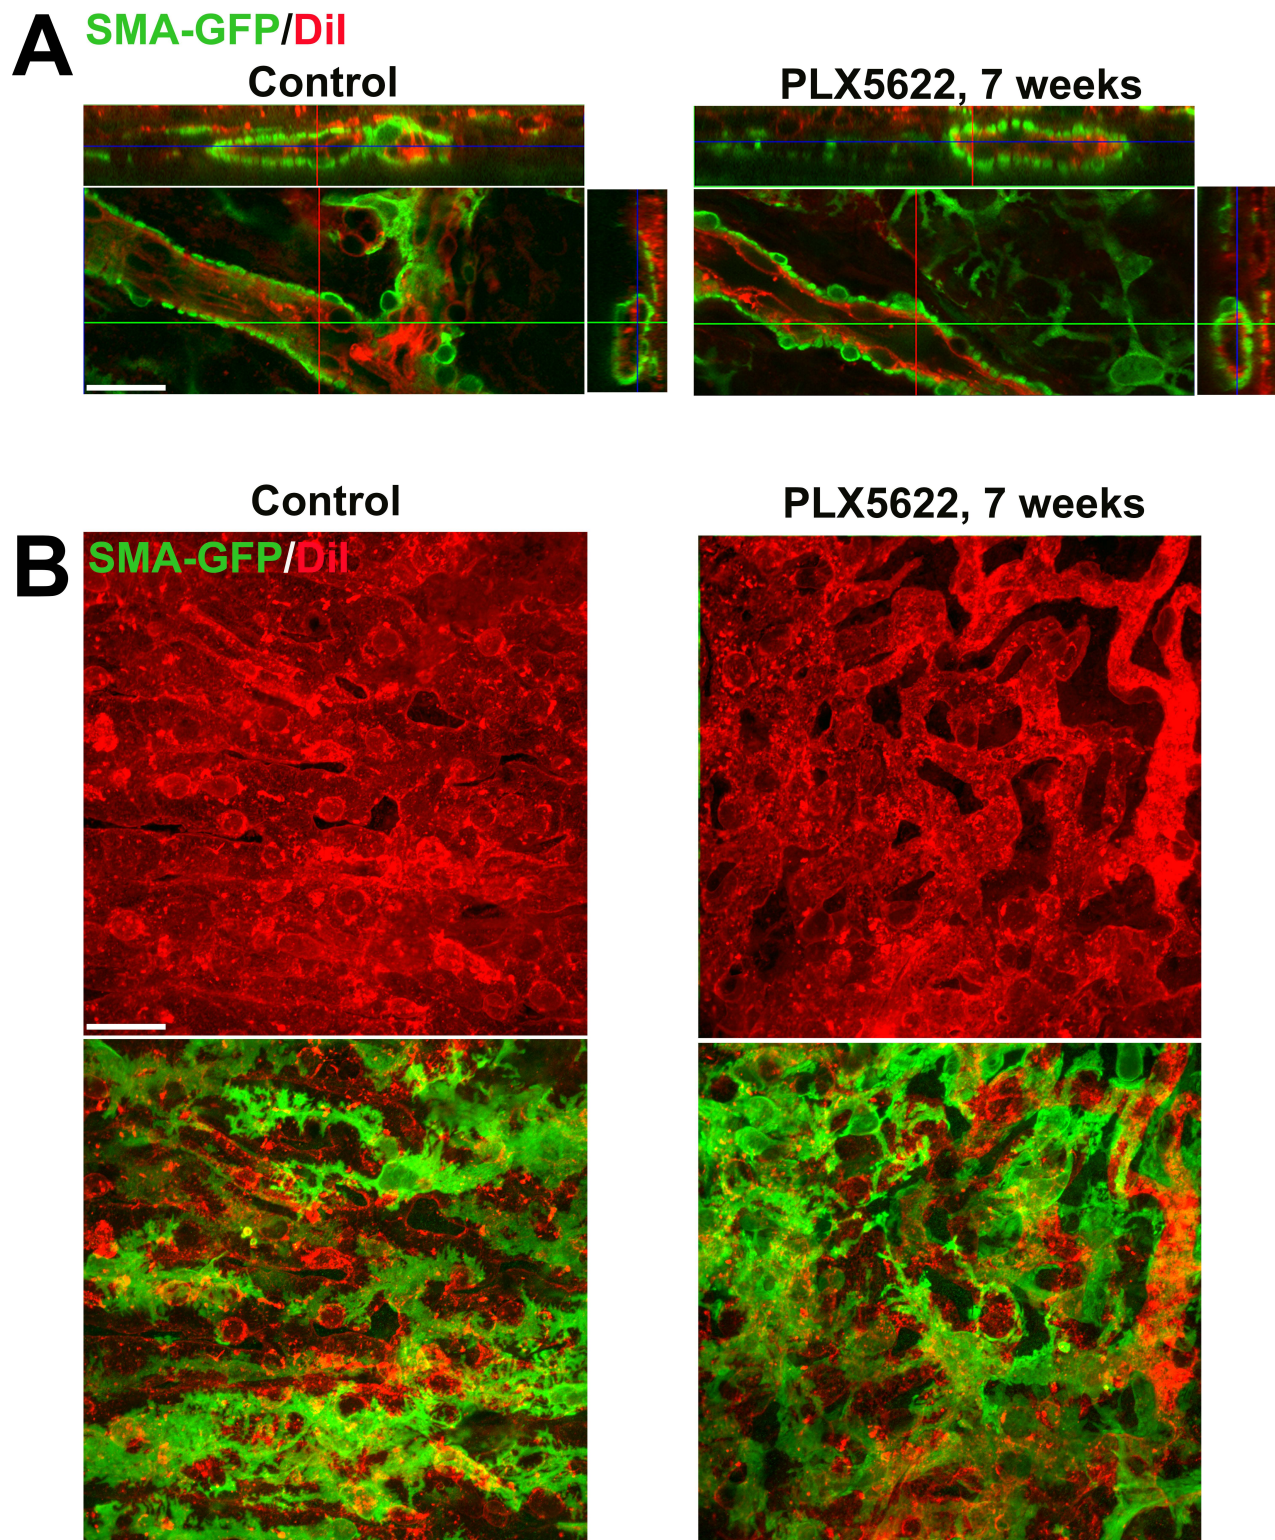

**Figure 3-figure supplement 1. Long-term depletion of resident choroidal macrophages does not result in marked depletion or disorganization of smooth muscle actin (SMA)-expressing perivascular smooth muscle cells or choriocapillaris pericytes.** Albino transgenic mice possessing a transgene containing an  $\alpha$ -SMA promoter driving the expression of green fluorescent protein (GFP) were used to visualize perivascular cells of the choroidal vasculature. The choroidal vasculature was visualized by systemic Dil perfusion (red). **(A)** Perivascular smooth muscle cells of adult 3-month old mice administered diet containing PLX5622 for 7 weeks to deplete choroidal macrophages were compared with those in controls (age-matched mice fed standard diet). Orthogonal views of confocal images demonstrated complete coverage of large choroidal vessels (red) with contiguous perivascular cells (green) that were largely unaltered with choroidal macrophage depletion. **(B)** Confocal images of the choriocapillaris visualized enface demonstrated a similar presence and coverage of ramified pericytes on the scleral surface of choriocapillaris vasculature in depleted and control animals. Scale bars = 20  $\mu$ m, **n = 3 animals each treatment group.**
