# Supplementary material for: CSF1R blockade induces macrophage ablation and results in mouse choroidal vascular atrophy and RPE disorganization
Source: eLife journal article supplement (doi:10.7554/elife.55564), 2020-04-01
Supplement: supp [file elife-55564-supp-v1.zip]

## Continuous Depletion Group

- Baseline
- ▼ PLX5622, 3 weeks
- ◆ PLX5622, 7 weeks

Dark Adapted  
a wave

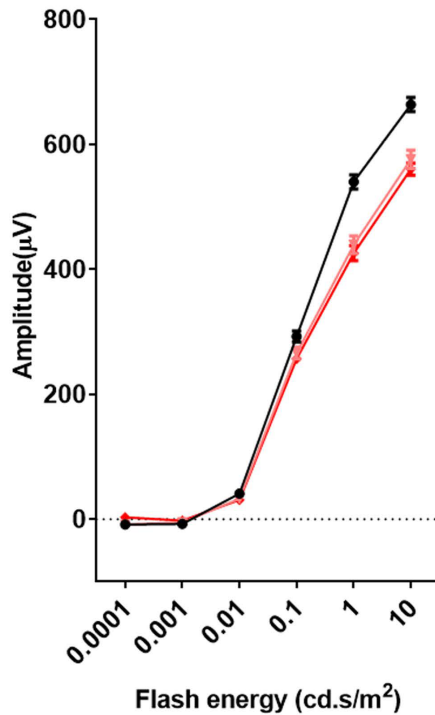

## Depletion-repopulation Group

- Baseline
- ▼ PLX5622, 3 weeks
- ◆ Repopulated (week 3 to 7)

Dark Adapted  
a wave

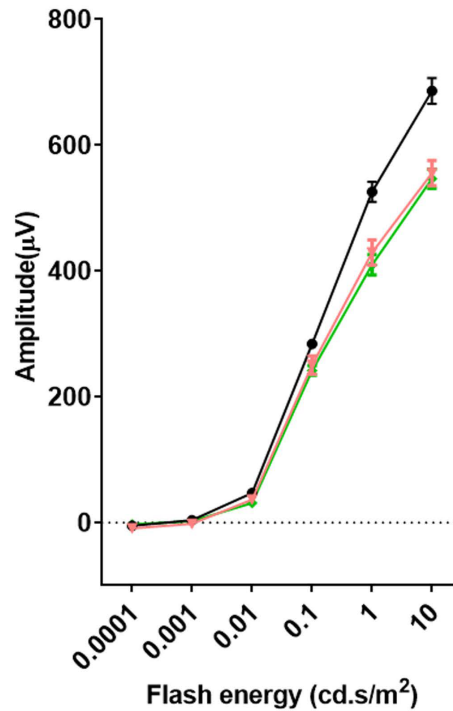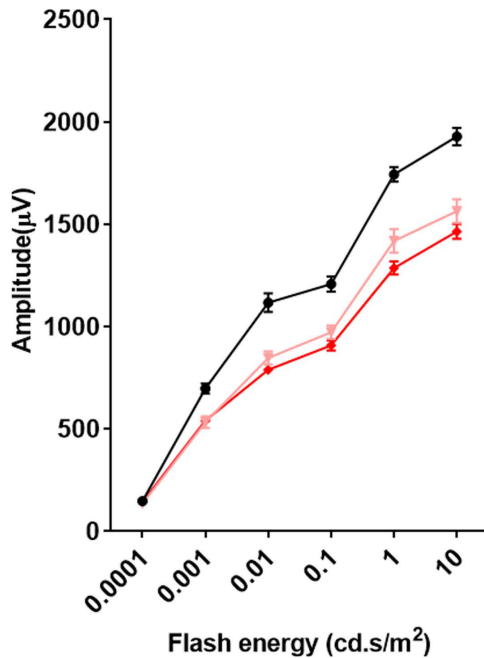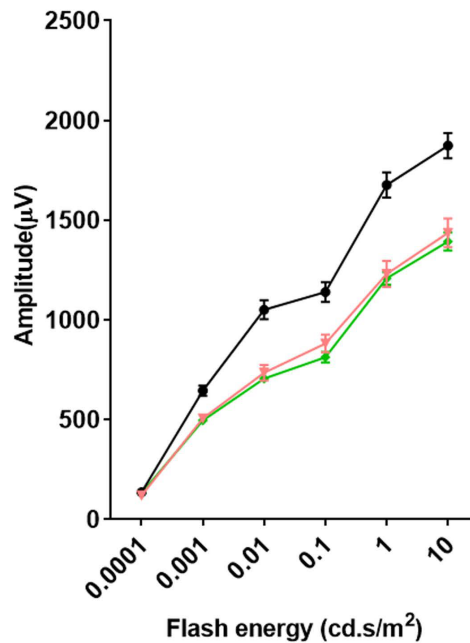

**Figure 8-figure supplement 2. Changes in ERG amplitudes during macrophage depletion and subsequent macrophage repopulation.** The scotopic electroretinographic responses showed significantly decreased a- and b-wave amplitudes at 3 weeks of depletion in both continuous depletion and depletion-repopulation groups. Slight decrease of scotopic b-wave was observed in the continuous depletion group at 7 weeks of depletion. Scotopic a- and b-wave amplitudes were stable between 3 to 7 weeks during macrophage repopulation. n = 10 eyes from 5 animals in each treatment group.
