# Supplementary material for: CSF1R blockade induces macrophage ablation and results in mouse choroidal vascular atrophy and RPE disorganization
Source: eLife journal article supplement (doi:10.7554/elife.55564), 2020-04-01
Supplement: supp [file elife-55564-supp-v1.zip]

**A**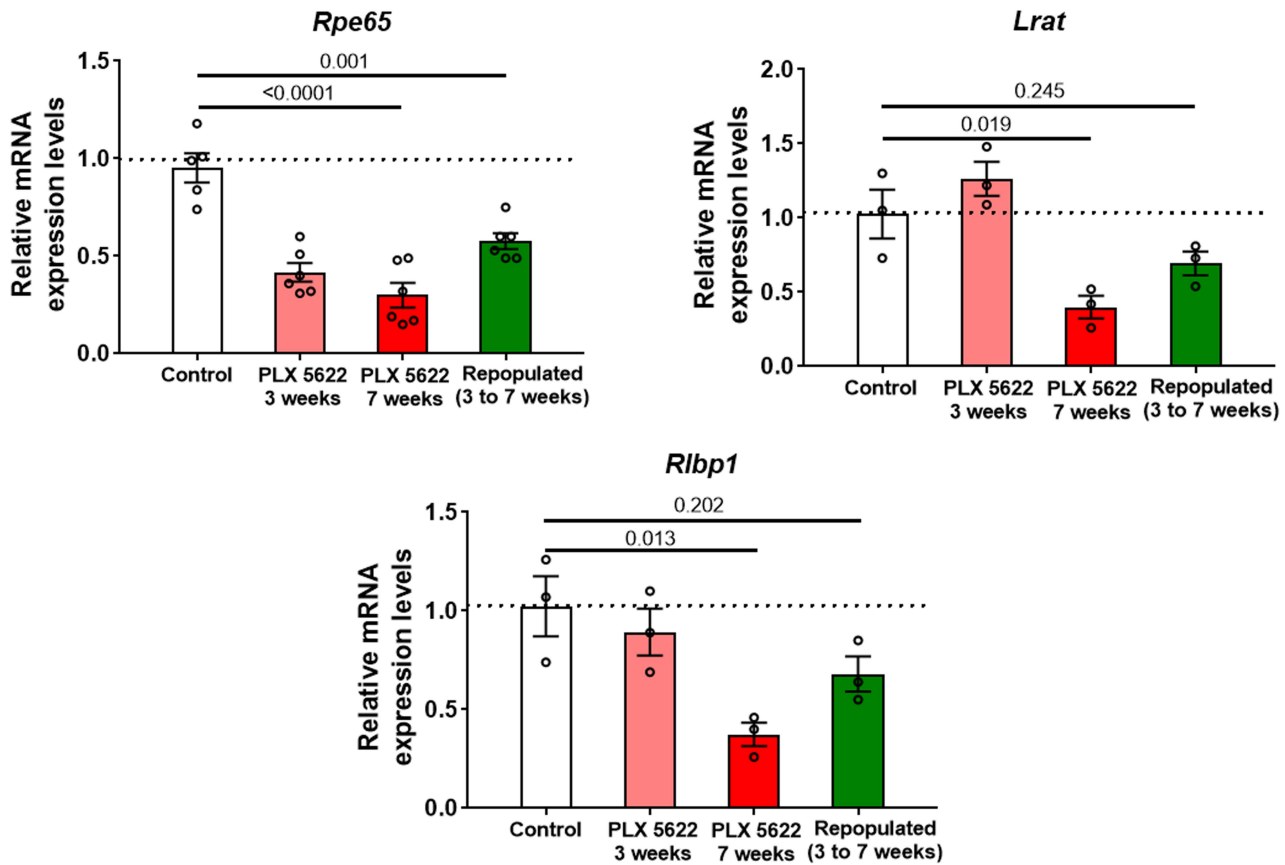**B**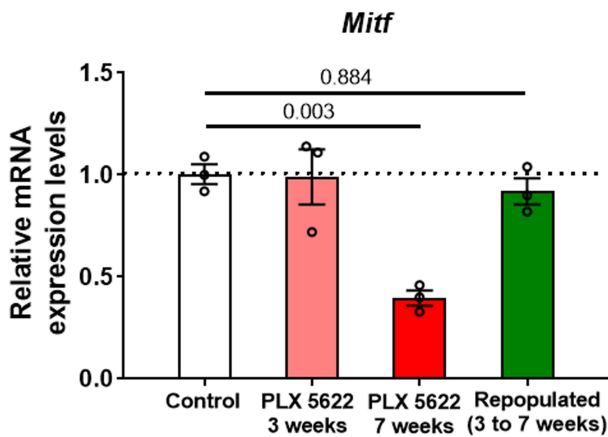**C**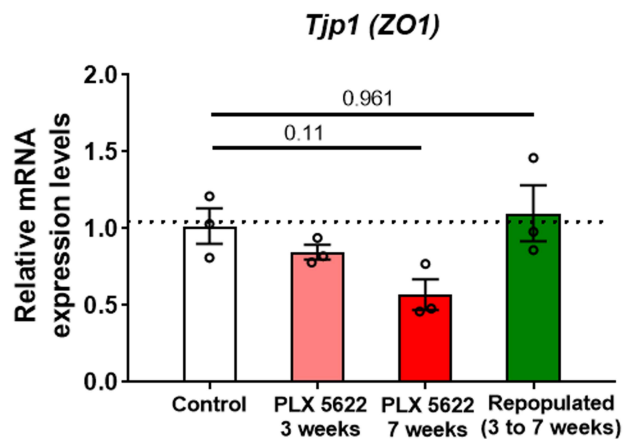

**Figure 8-figure supplement 1. Macrophage depletion-associated changes in RPE genes expression are ameliorated with macrophage repopulation.** Changes in mRNA expression of RPE-specific genes in sclerochoroidal tissue from the following experimental groups were evaluated with RT-PCR: (1) untreated age-matched controls, (2) macrophage-depleted for 3 weeks, (3) macrophage-depleted for 7 weeks (continuous depletion group), and (4) macrophage-depleted for 3 weeks, followed by 4 weeks of macrophage repopulation (depletion-repopulation group). **(A)** RPE genes related to visual cycle function (*Rpe65*, *Lrat*, *Rlbp1*), **(B)** *Mitf*, and **(C)** *Tjp1/Zo1*, demonstrated decreases with depletion that were ameliorated or reversed with macrophage repopulation. P values correspond to comparisons relative to control made using a 1-way ANOVA test, **n = 3 to 6 animals each treatment group**.
